# Supplementary material
Source: Research Square preprint supplement (doi:10.21203/rs.3.rs-8524281/v1)
Supplement: Supplementary file 1 [file 079d8b80e58c1a7481b1e3e7.pdf]

**SURVEY**

**“DONATING BLOOD AND ITS COMPONENTS: A STUDY OF  
MOTIVATIONAL FACTORS AND CHALLENGES AMONG UNIVERSITY  
STUDENTS IN POLTAVA, UKRAINE, DURING WAR”**

**Informed Consent and Explanation**

Dear Participant,

You are invited to take part in an anonymous survey titled “Donating blood and its components: a study of motivational factors and challenges among university students in Poltava, Ukraine, during war”. The purpose of this study is to collect information about the attitudes, experiences, and motivations of university students in Poltava regarding blood donation, which will help us better understand the factors influencing youth donor activity during war.

Your participation in this survey is entirely voluntary. You have the right to refuse to participate at any time, either before starting or during the questionnaire, without providing any reason and without any negative consequences to you.

The survey is anonymous. All responses will be kept confidential and used solely for scientific analysis in aggregate form.

By proceeding to complete the questionnaire, you confirm that you have read and understood this information and voluntarily agree to participate.

- I agree
- I disagree

*(Next continuing in case of answering “I agree”)*

***I. General questions (socio-demographic information):***

1. Which University do you study at?
  - Poltava State Medical University
  - Poltava V.G. Korolenko National Pedagogical University
  - Poltava State Agrarian University

- National University «Yuri Kondratyuk Poltava Polytechnic»
2. Your gender:
    - Male
    - Female
  3. Your age (in years): \_\_\_\_\_
  4. Your field of study:
    - Medical
    - Non-medical
  5. Year of study? \_\_\_\_\_
  6. What is your blood type?
    - O(I) Rh «+»
    - O(I) Rh «-»
    - A(II) Rh «+»
    - A(II) Rh «-»
    - B(III) Rh «+»
    - B(III) Rh «-»
    - AB(IV) Rh «+»
    - AB(IV) Rh «-»
    - Don't know
  7. Have you ever donated blood or blood components?
    - Yes
    - No

***II. Questions for donors (who answered question #7 – YES):***

8. If so, how many times?
  - Once
  - 2-5 times
  - More than 5 times
9. What blood component were you a donor of? (Multiple choice, if needed):

- Whole blood
- Plasma
- Platelets
- Other

10. What motivated you to become a donor? (Choose several options if you wish):
- The desire to help relatives or people you know
  - The desire to help a stranger, which you learned about from informative sources (social networks, advertisements, etc.)
  - Financial benefit
  - The desire to help wounded soldiers or civilians during a full-scale invasion
  - To join the donation campaign on June 14, on International Blood Donor Day
  - Your own motivation
11. If you have chosen the option: "Your own motivation", please describe it here:
- \_\_\_\_\_
12. Did you feel anxious before your first blood donation?
- None
  - A little
  - Very
13. Did you receive enough information before donating blood (about preparation, contraindications, recovery)?
- Yes, sufficient
  - No, insufficient
  - Partially
14. How did you feel yourself after the donation?
- Euphoric because of saving someone's life
  - As usual
  - Slightly unwell
  - Bad
15. Do you plan to donate blood in the future?

- Yes, definitely
- Yes, only if necessary
- Maybe
- No

***III. Questions for non-donors (who answered question #7 – NO):***

16. If no, why not?

- I am afraid of pain or needles
- I have contraindications due to health conditions
- I do not have enough information or awareness on this topic
- I do not see the need for it
- My own reason

17. If you have selected the option: "My own reason", please describe it here:

\_\_\_\_\_

18. What could motivate you to donate blood? (Choose several options, if you wish):

- The need to help wounded soldiers or civilians
- An example from acquaintances, friends
- An information campaign at a university
- Financial support
- Social recognition or a certificate
- Own answer

19. If you have selected the option: "Own answer", please describe it here:

\_\_\_\_\_

20. Would you like to try donating blood in the future?

- Yes, definitely
- Maybe, if there is an opportunity
- No, I don't want to

***IV. Attitudes towards blood donation and its components in general, awareness of donation issues, barriers and motivational factors for young people – students of Poltava***

*universities. (Continuation of the survey for all respondents)*

21. Do you know where the blood donation points are located in Poltava?

- Yes
- No

22. If your educational institution or city regularly held Donor Days, would you participate?

- Yes, definitely
- Maybe, if it would be convenient
- No

23. How would you like to find out about these days? (Multiple choice, if needed):

- Through friends or acquaintances
- Through social networks
- Through the university
- Own answer

24. If you have selected the option: "Own answer", please describe it here:

\_\_\_\_\_

25. What do you think might deter potential donors? (Multiple choice, if needed):

- Fear of needles or pain
- Lack of awareness
- Lack of time
- Contraindications due to health conditions
- Own answer

26. If you have selected the option: "Own answer", please describe it here:

\_\_\_\_\_

27. Do you think blood donation is being promoted enough among young people?

- Yes
- No
- Partially

28. What do you think would be the most effective way to make blood donation a trend?

(Multiple choice, if needed):

- Engage famous bloggers, artists, athletes
- An expression of patriotism and support for the armed forces
- Implement a system for expressing gratitude and offering rewards
- Create a video highlighting the impact of blood donations
- Share the experience of donors through social media
- Challenge "donate blood – spread kindness".
- Own answer

29. If you have selected the option: "Own answer", please describe it here:

---

Thank you for your time and valuable contribution to this important research!
